# Supplementary material for: Unraveling the Regulatory Mechanisms Underlying Tissue-Dependent Genetic Variation of Gene Expression
Source: PLOS journal article supplement (doi:10.1371/journal.pgen.1002431), 2012-01-19

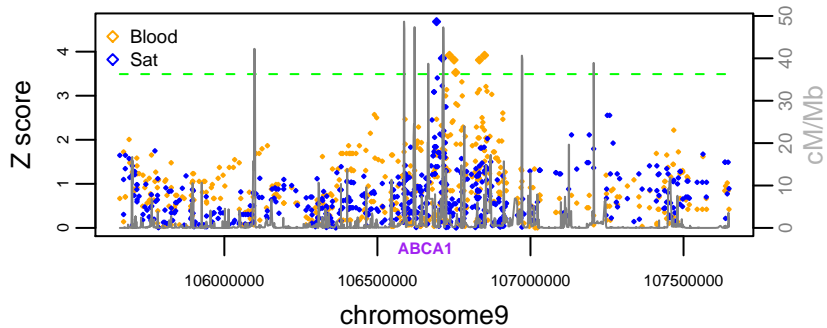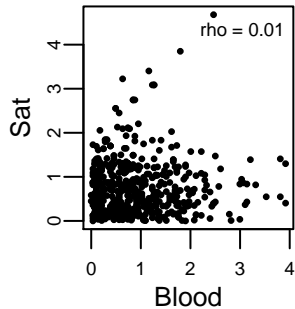

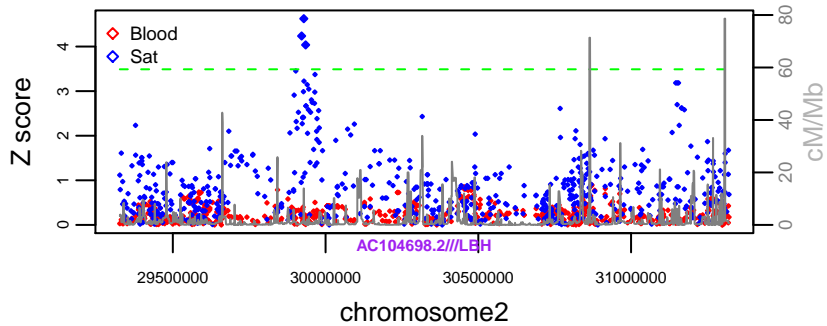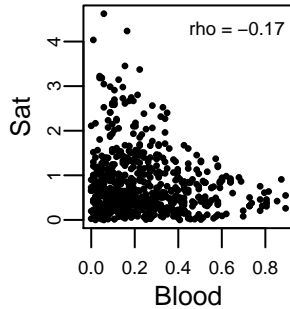

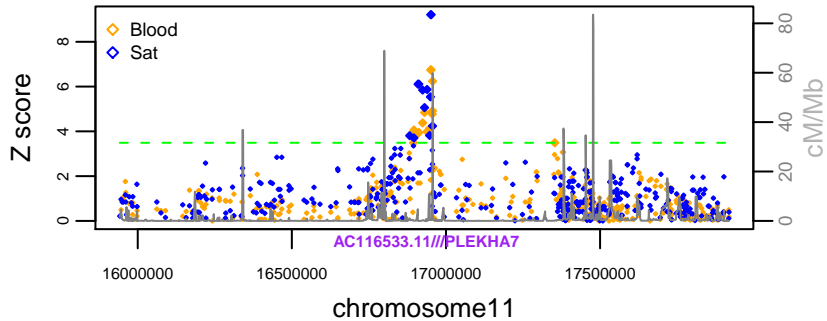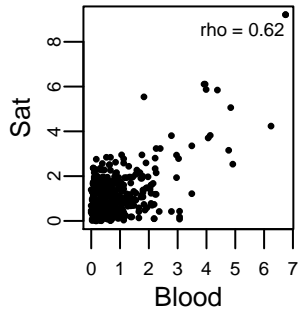

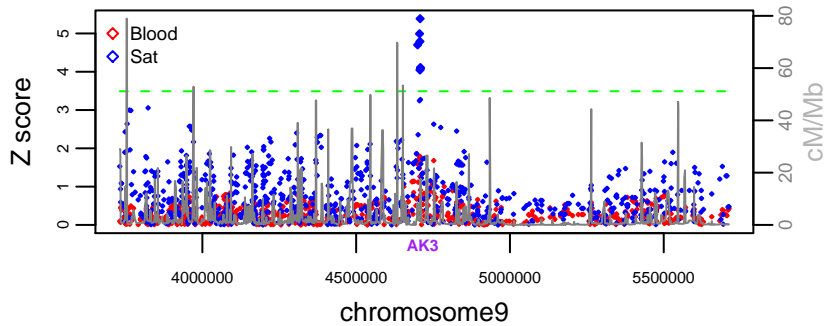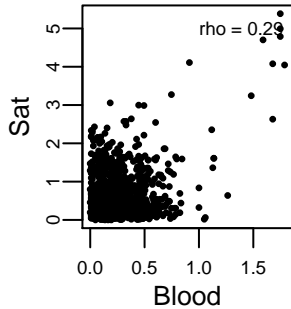

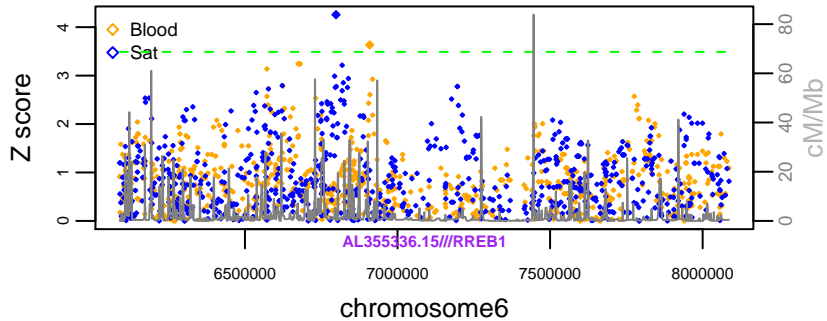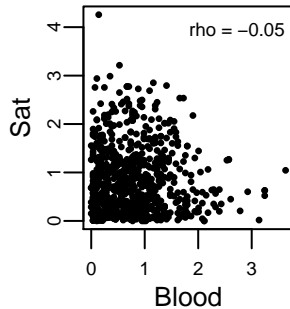

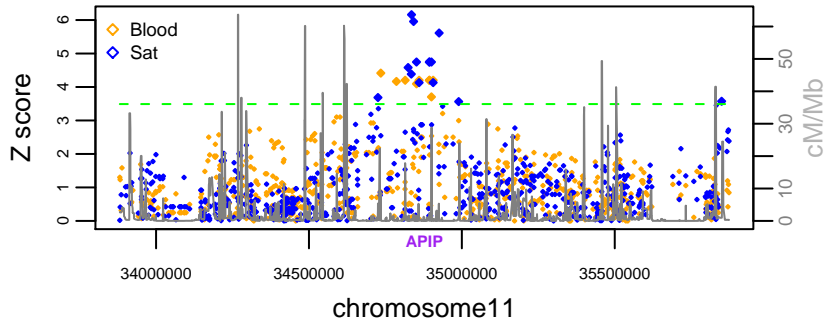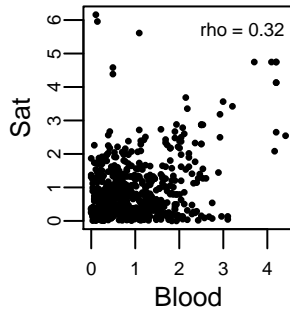

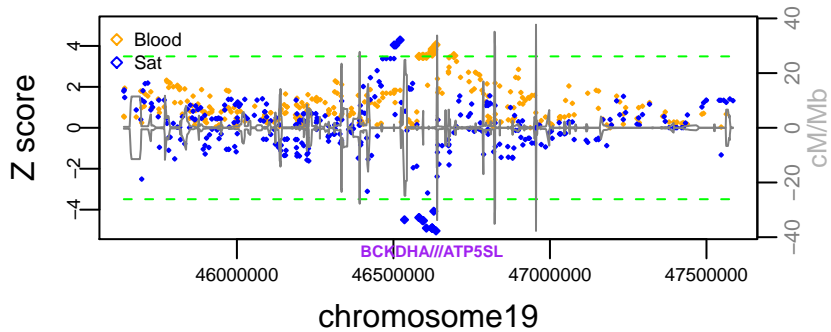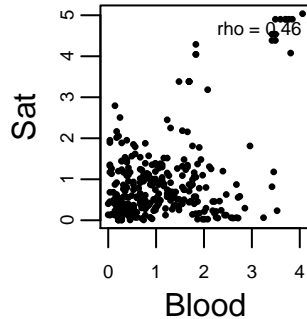

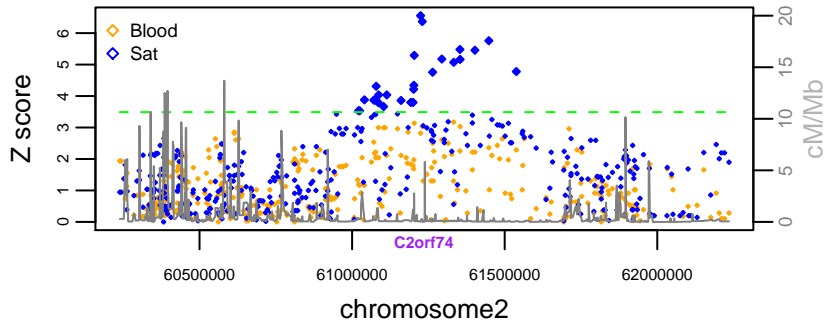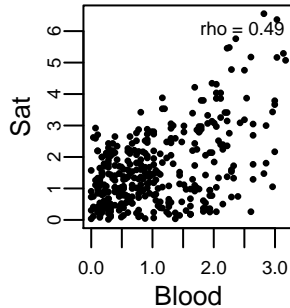



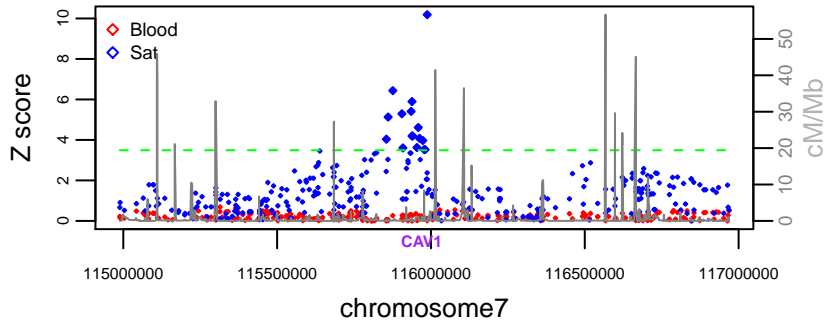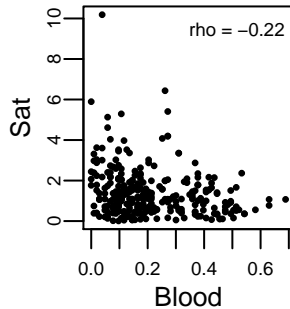

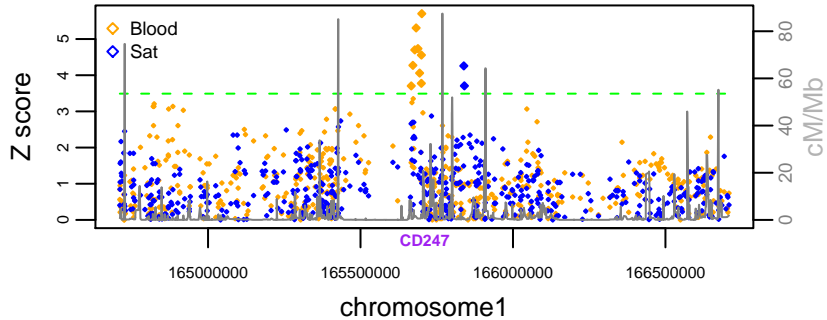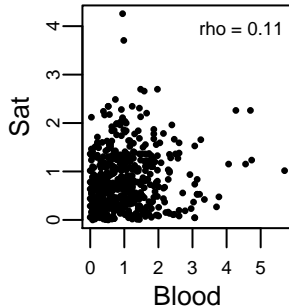

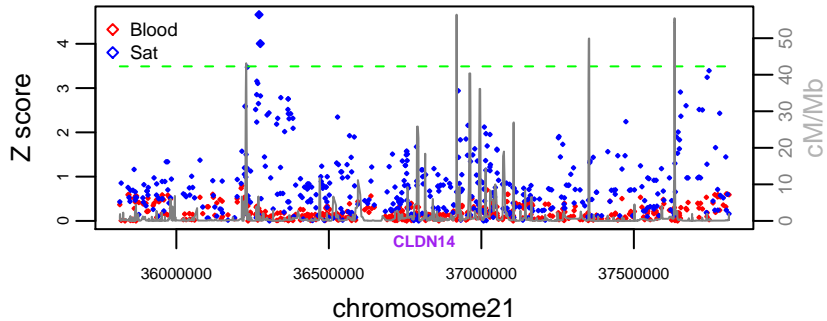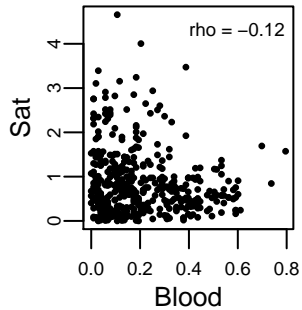

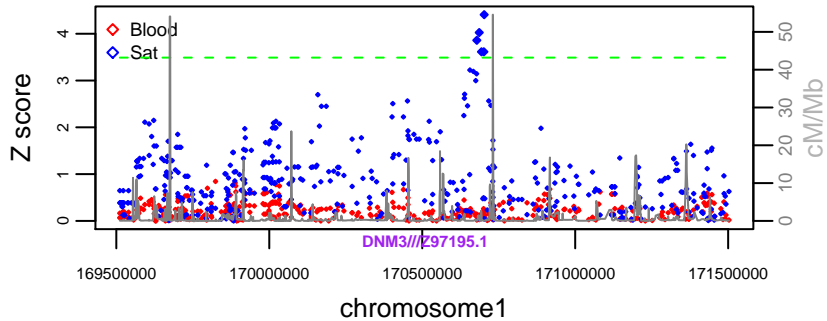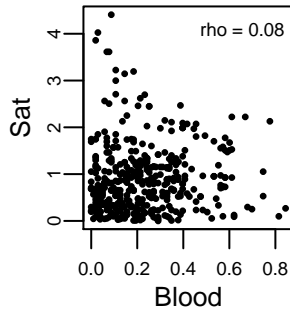

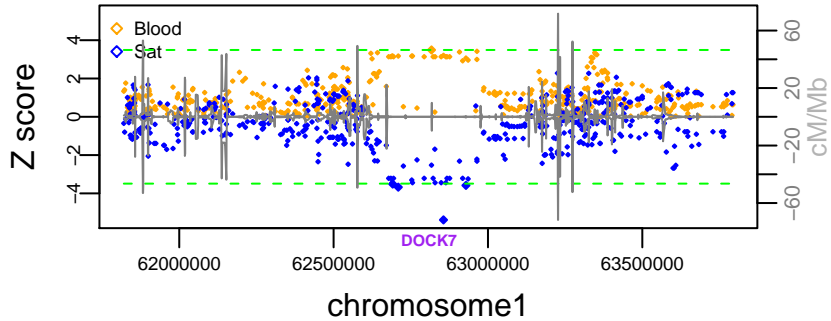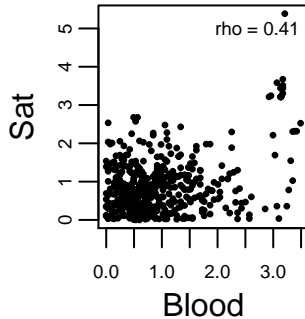

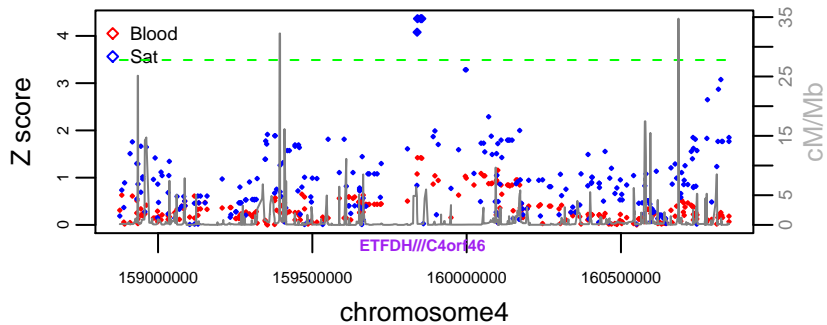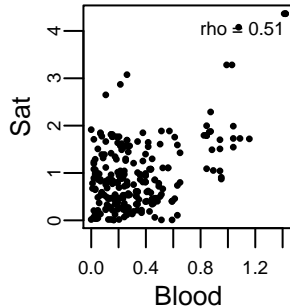

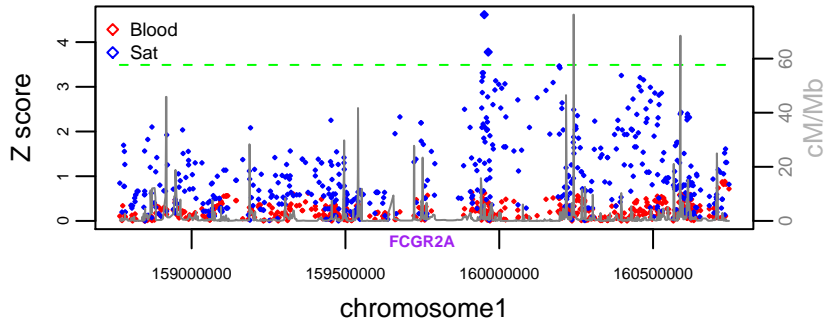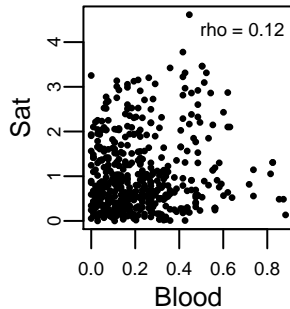

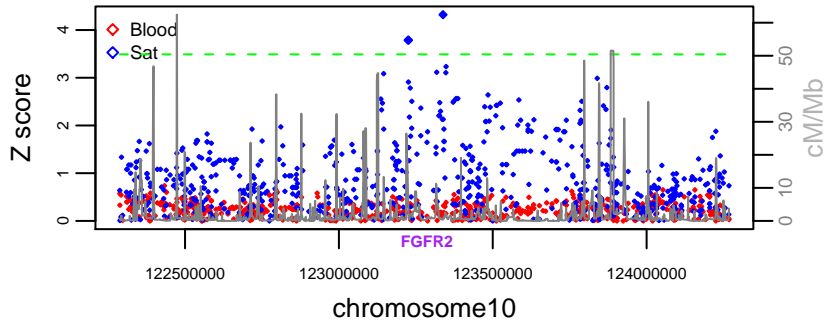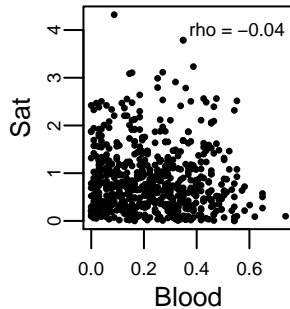



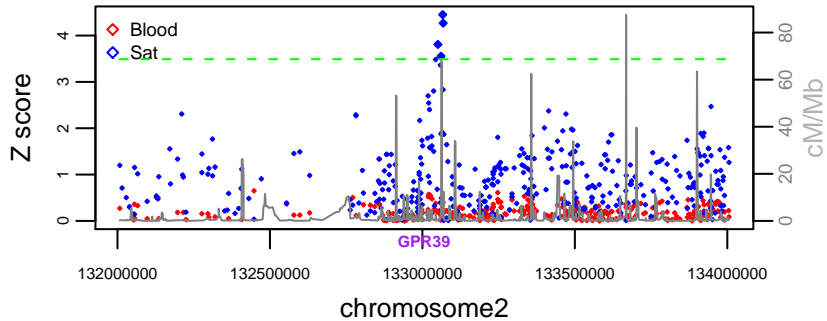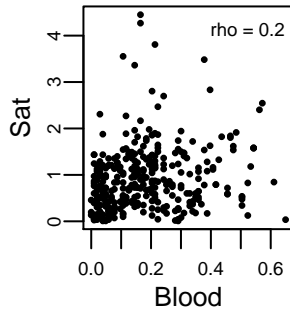

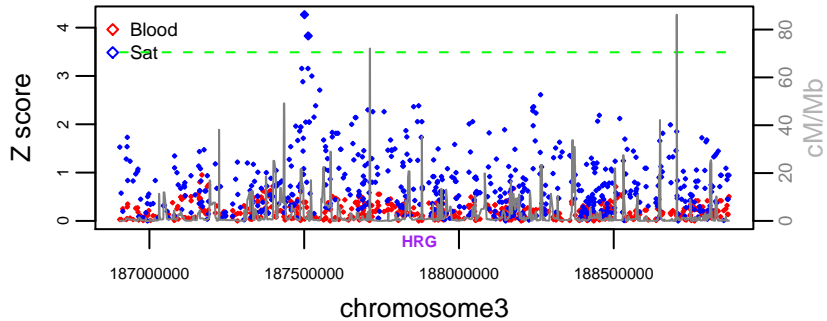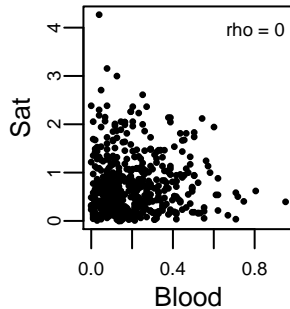

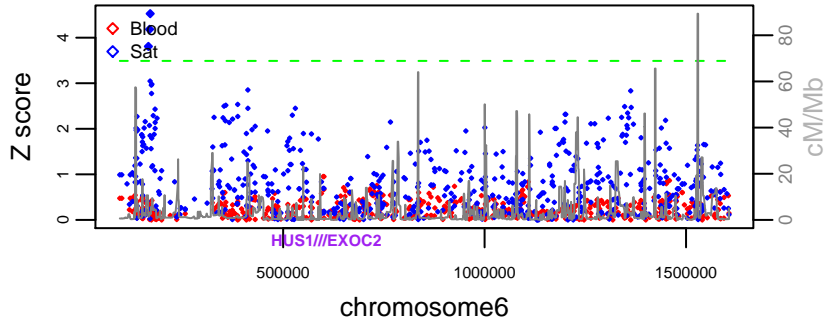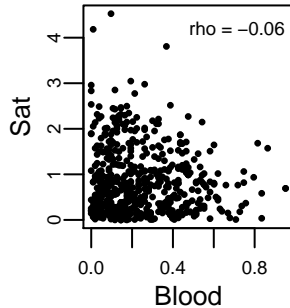

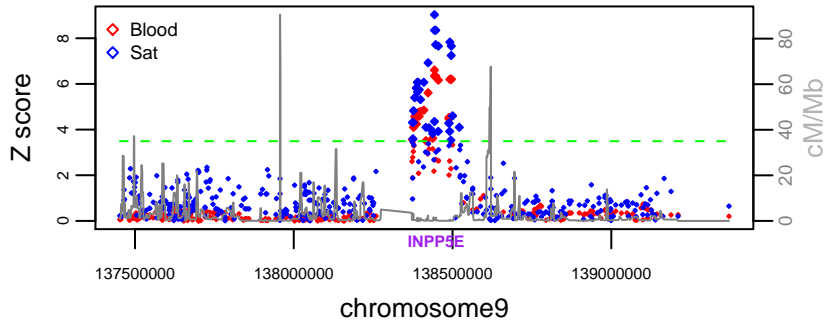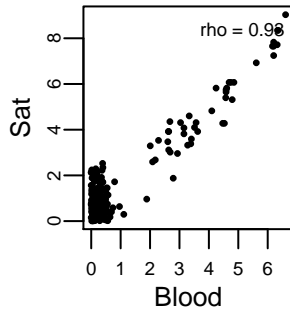

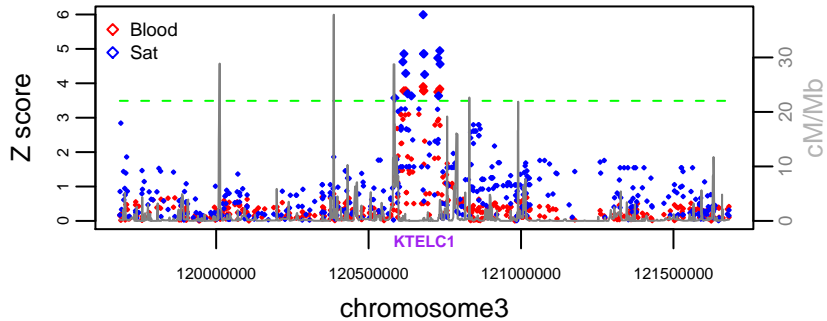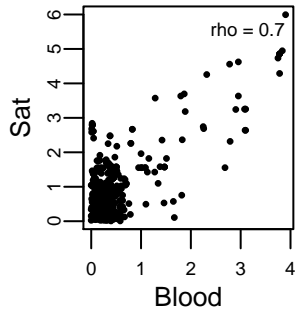

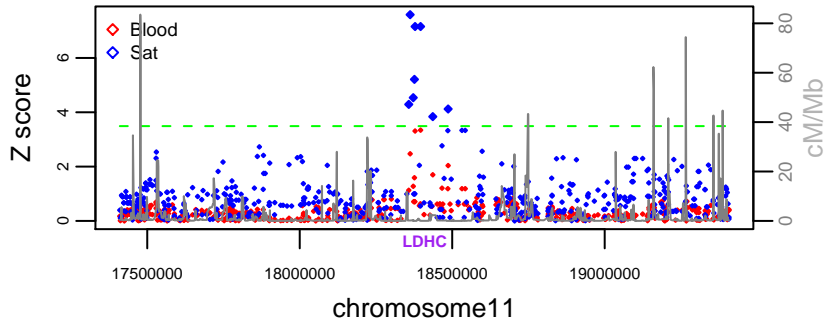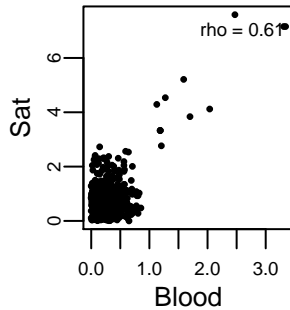

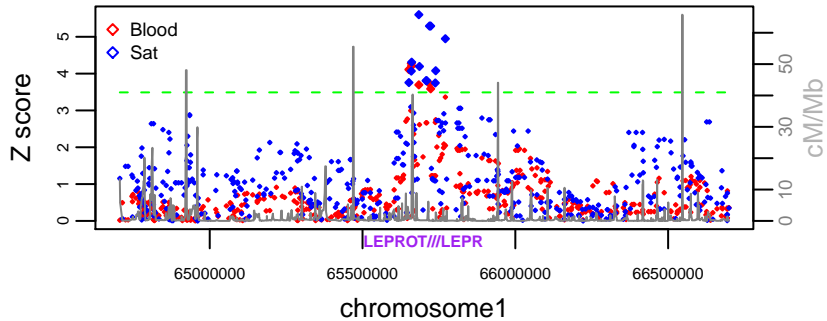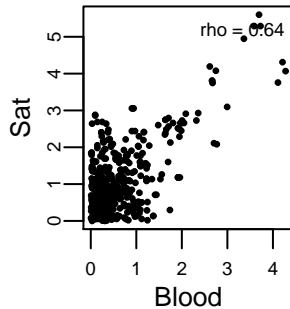

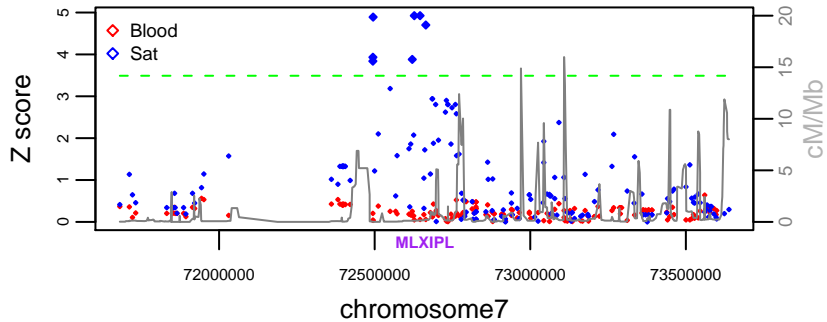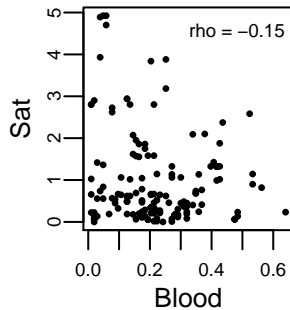



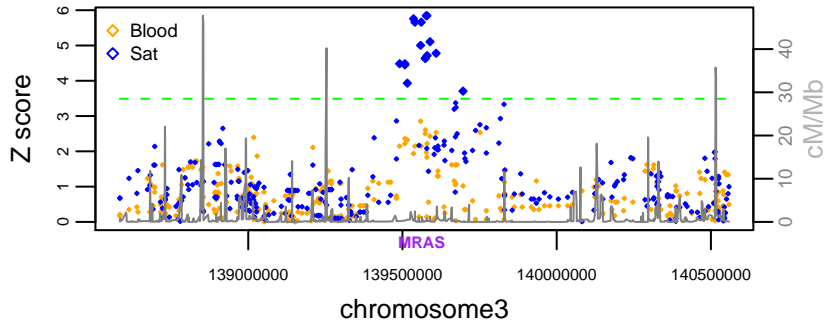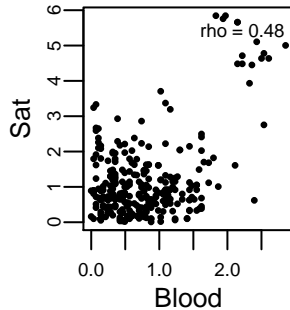

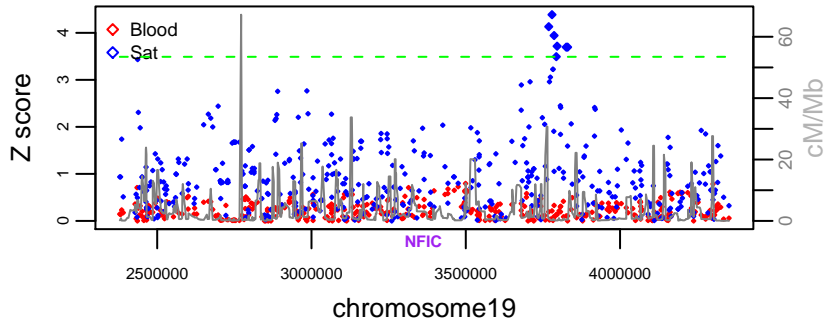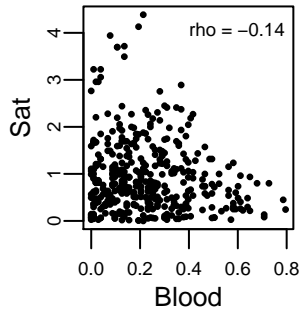

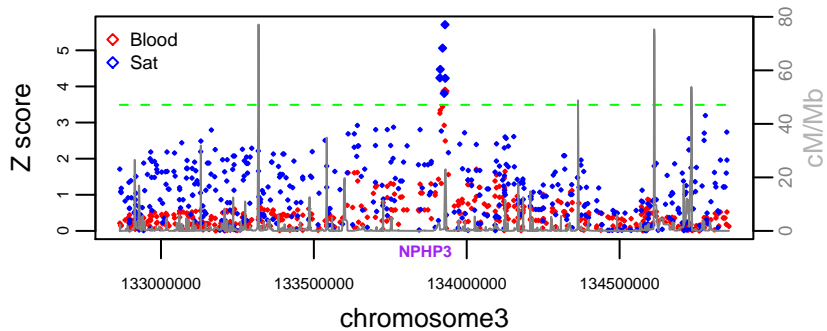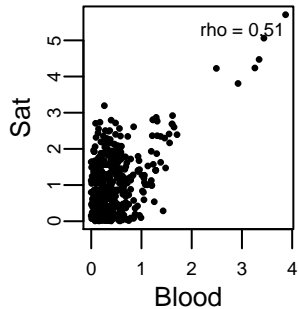

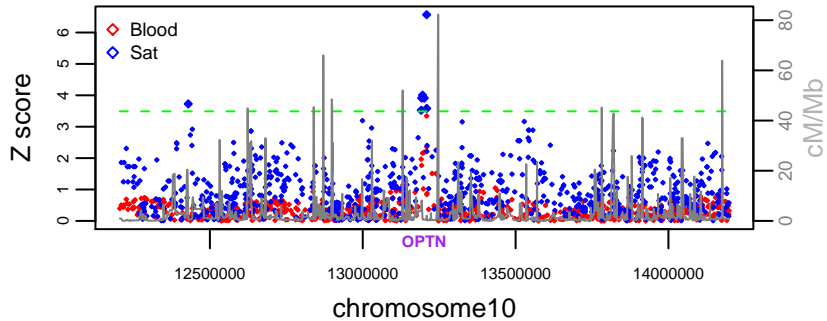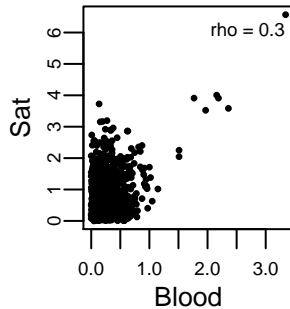

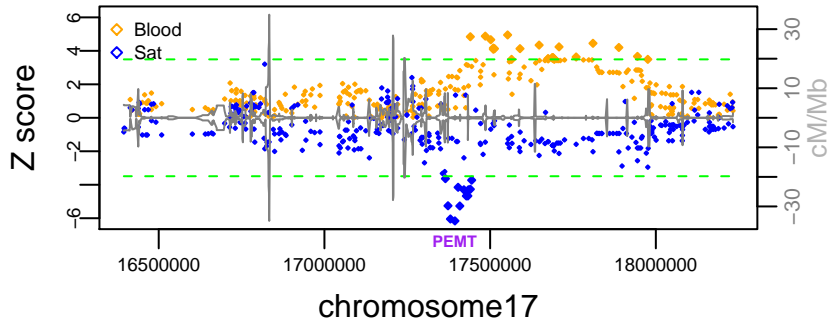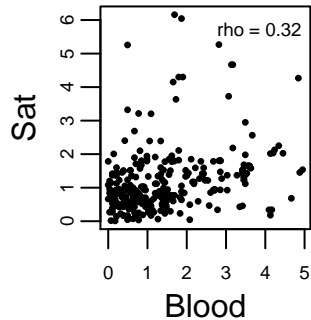

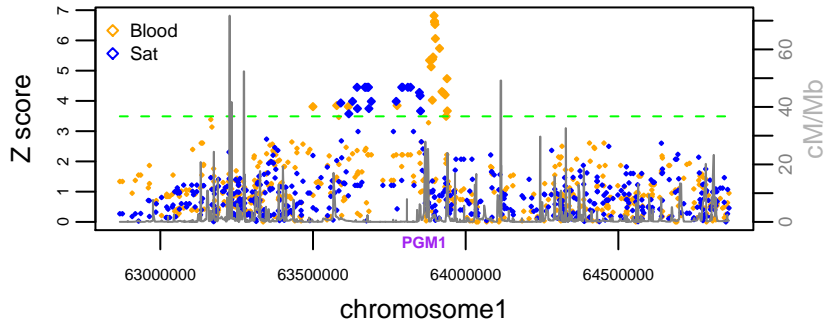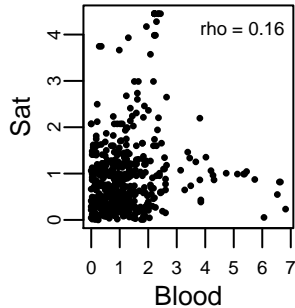

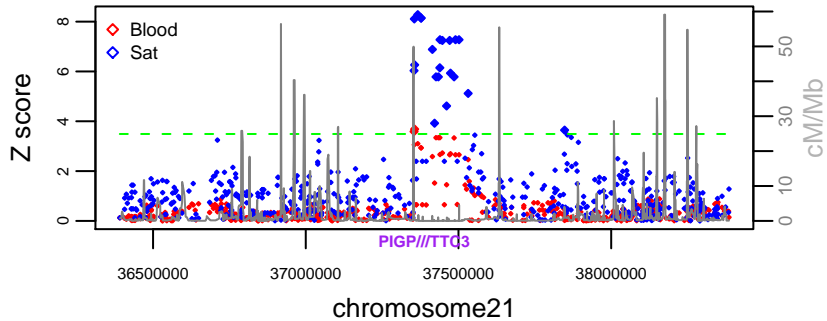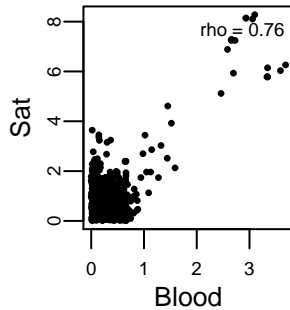

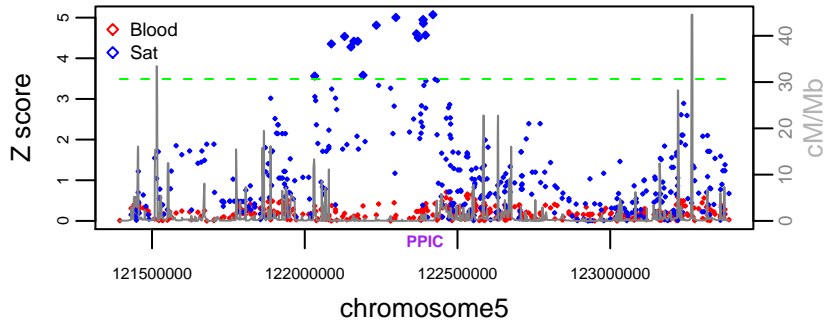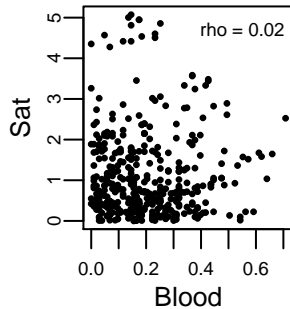



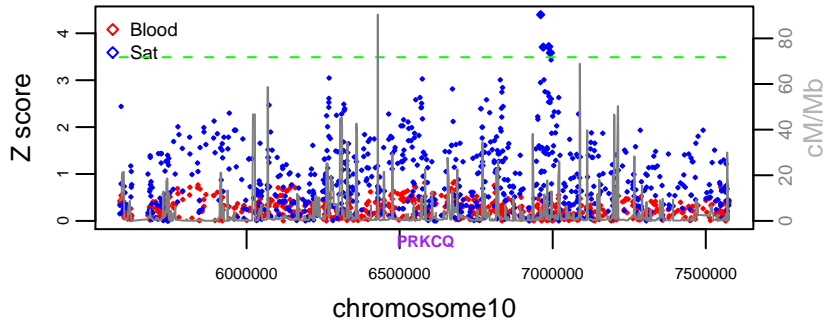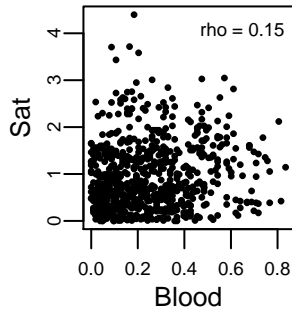

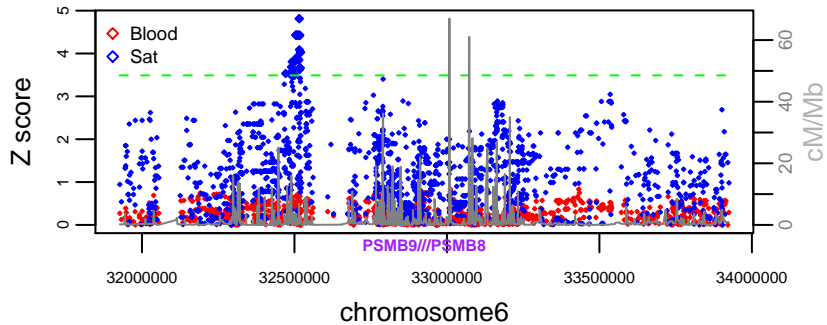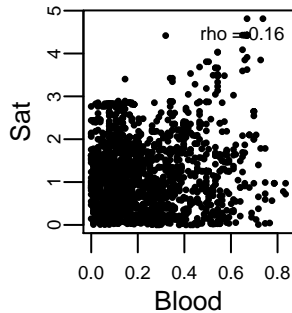

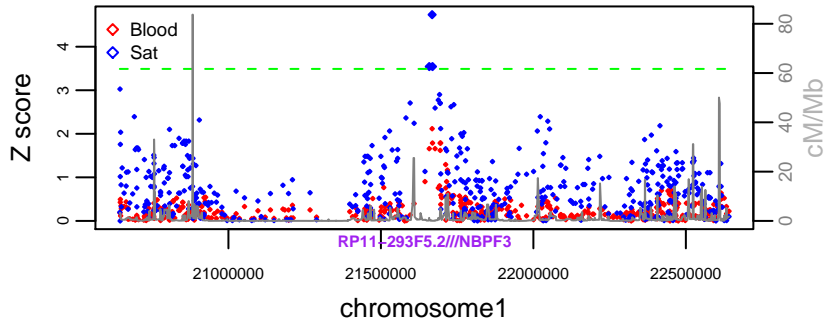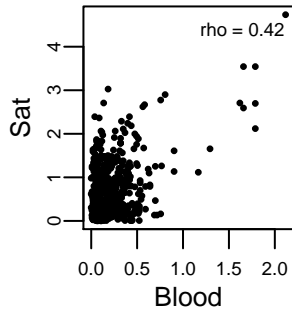

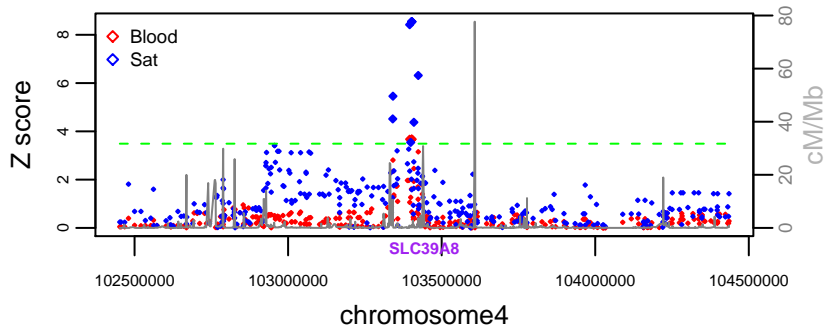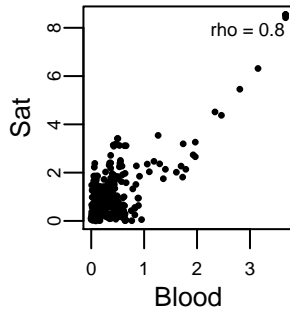

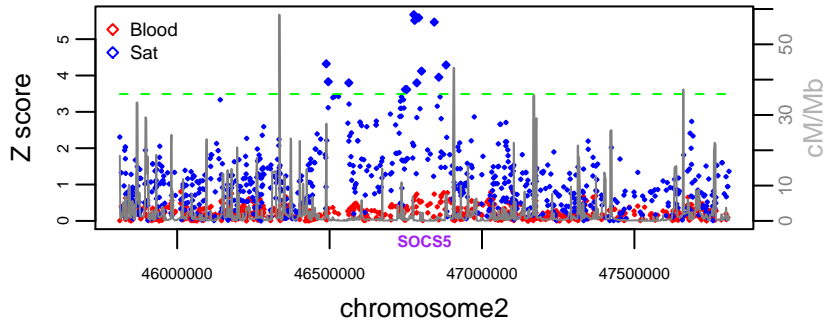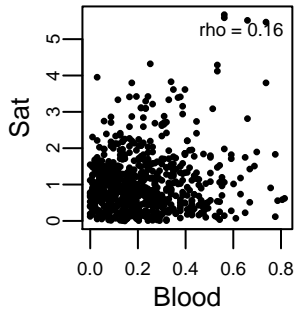

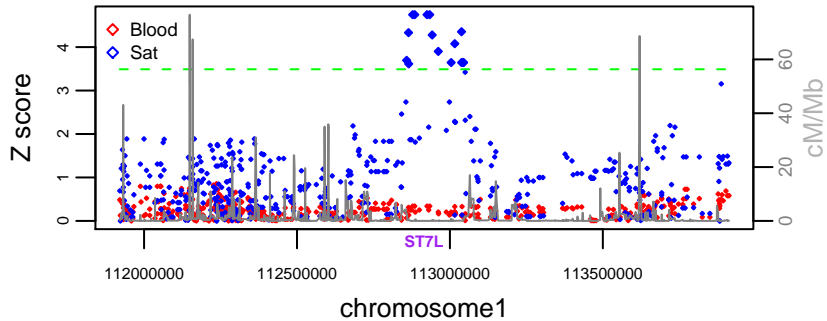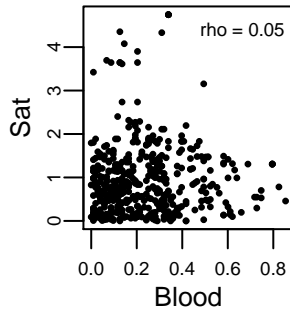

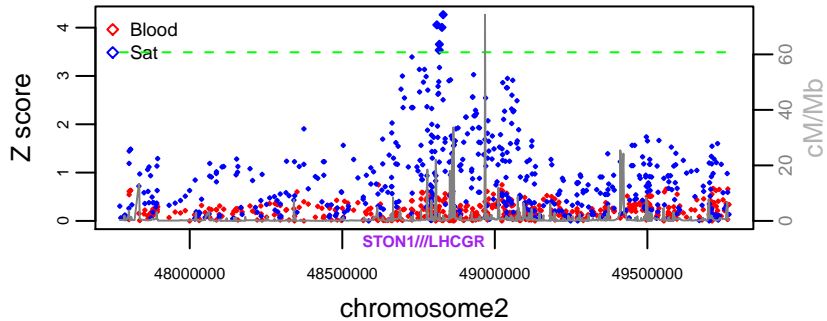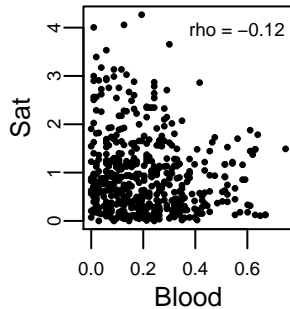

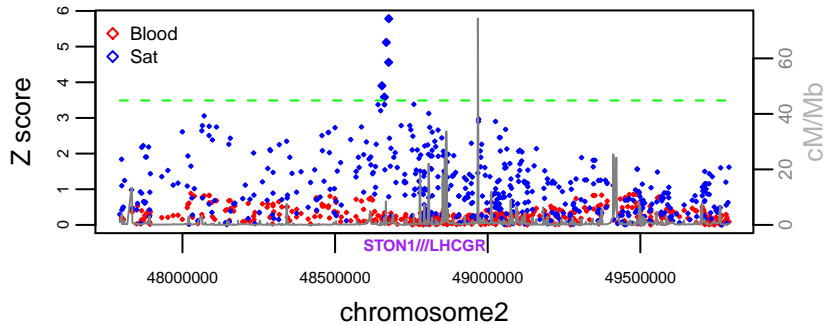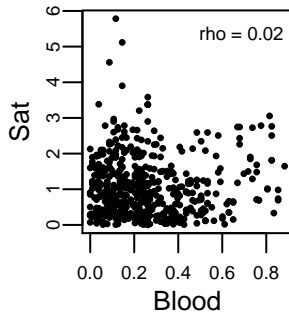



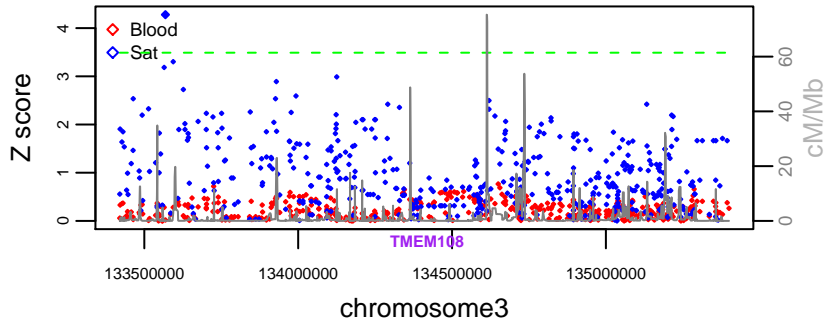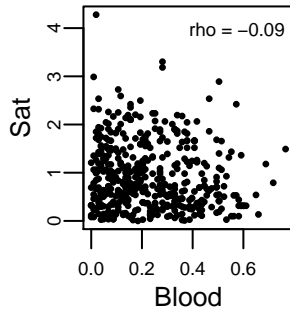

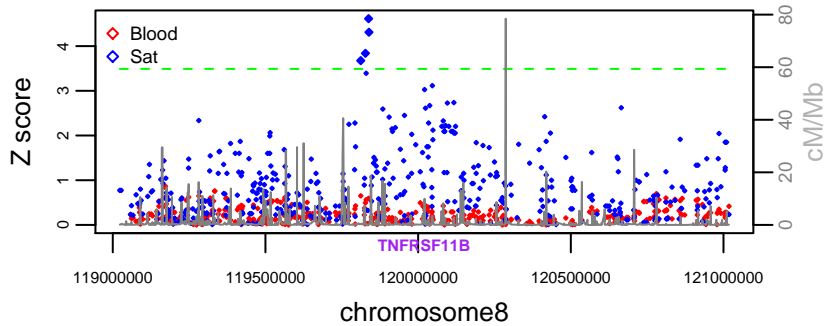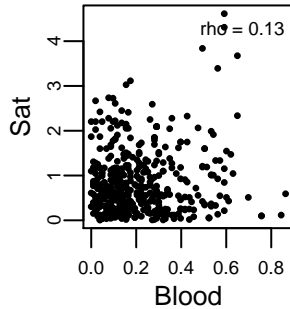

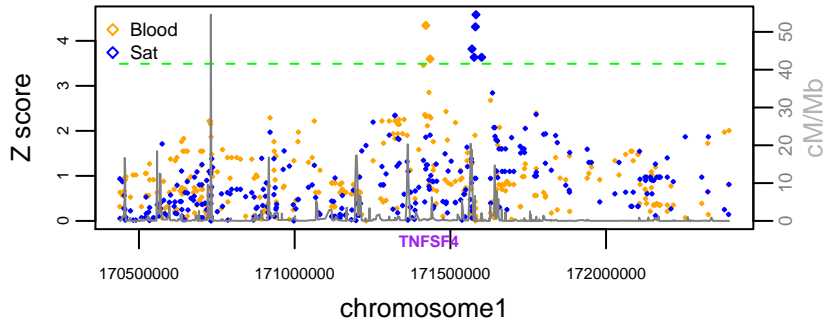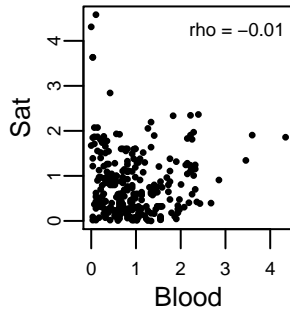

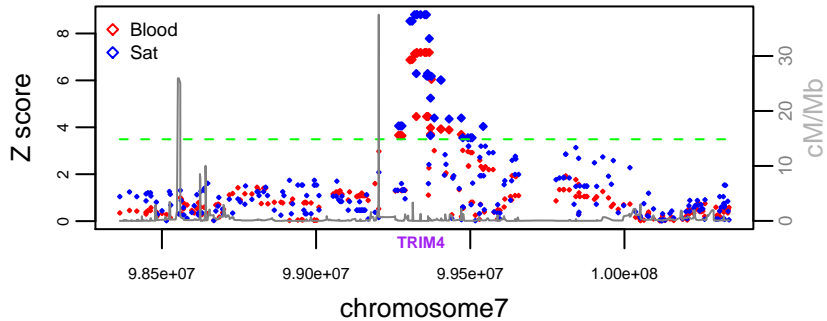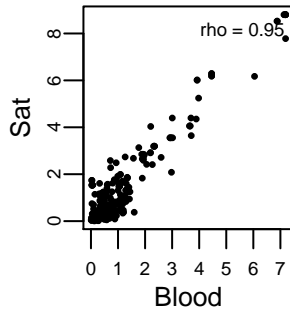

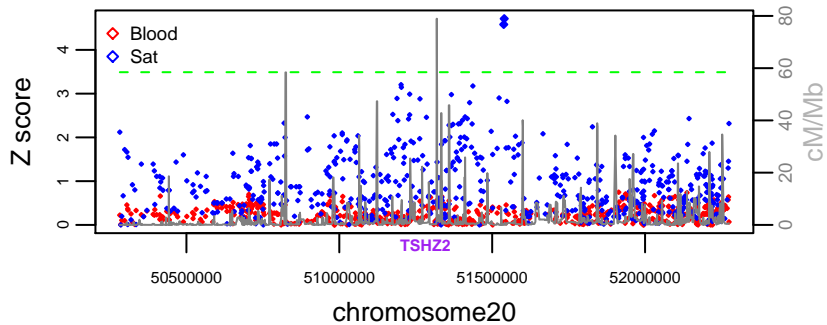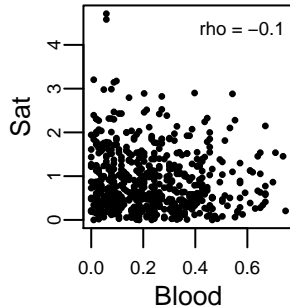

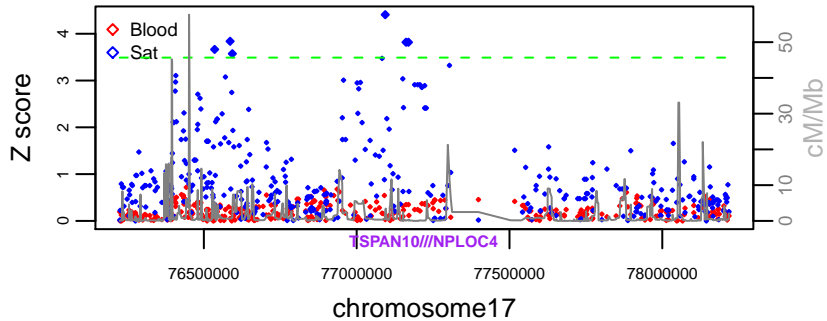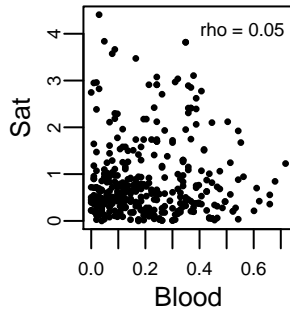

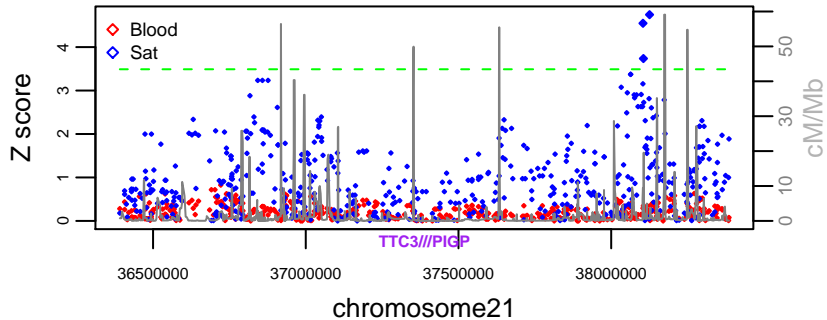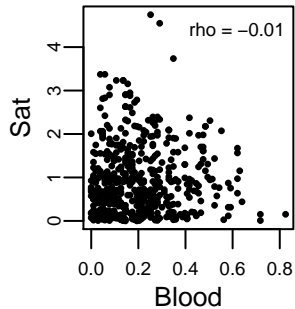

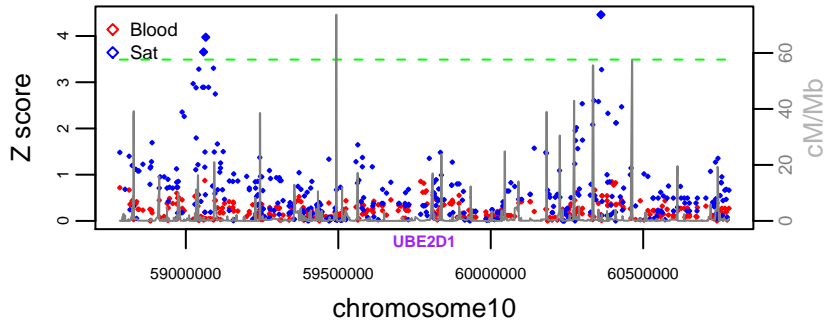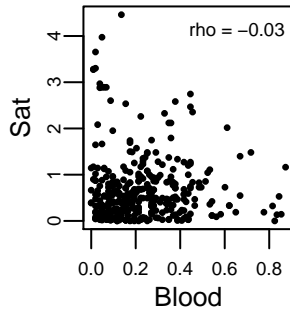



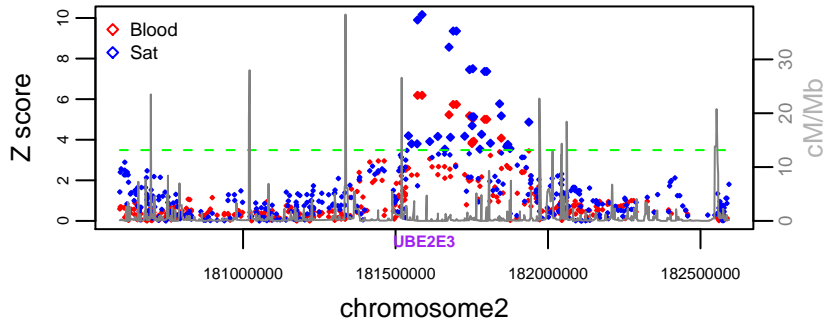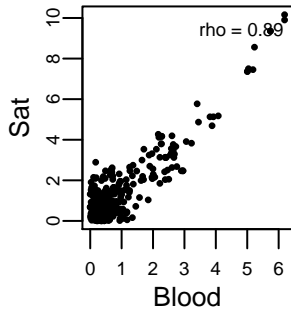

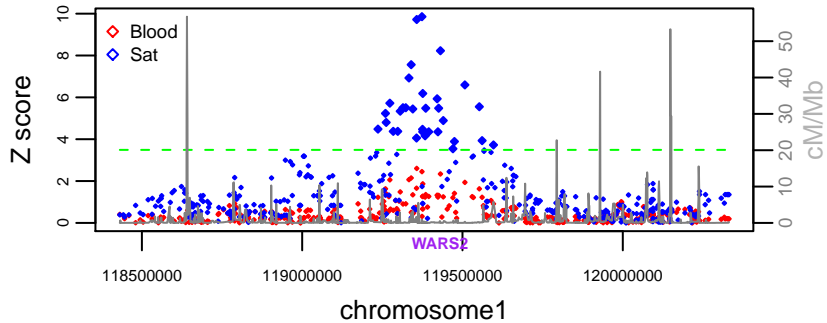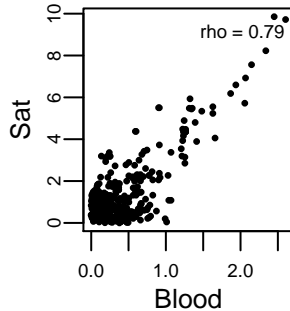

Supplement: S14 (10.1371/journal.pgen.1002431.s014) [file journal.pgen.1002431.s014]
