# Supplementary material for: Unraveling the Regulatory Mechanisms Underlying Tissue-Dependent Genetic Variation of Gene Expression
Source: PLOS journal article supplement (doi:10.1371/journal.pgen.1002431), 2012-01-19
Supplement: S4 (10.1371/journal.pgen.1002431.s004) [file journal.pgen.1002431.s004]

Meta-analysis  
non-blood tissues  
*23,878 probe-SNP pairs*

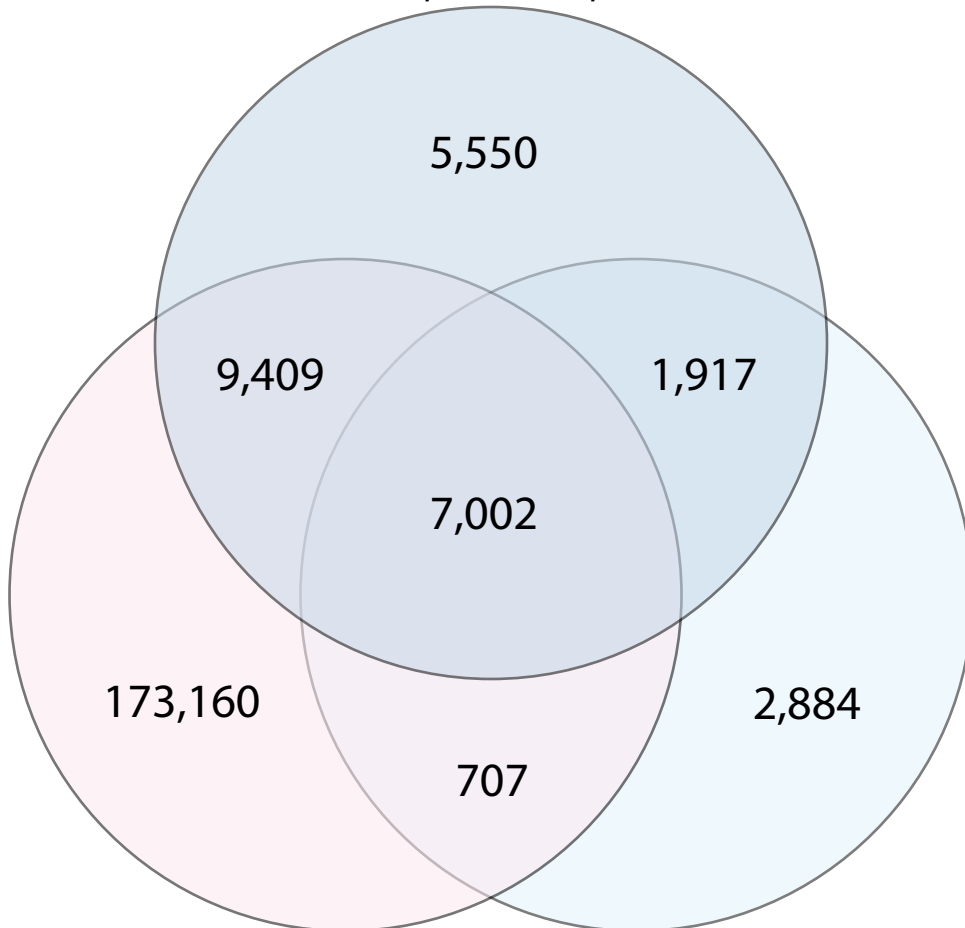

Single-tissue analysis  
blood  
*190,278 probe-SNP pairs*

Single-tissue analysis  
on four non-blood tissues  
*12,510 probe-SNP pairs*
