# Supplementary material for: Unraveling the Regulatory Mechanisms Underlying Tissue-Dependent Genetic Variation of Gene Expression
Source: PLoS Genet. 2012 Jan 19;8(1):e1002431. doi: 10.1371/journal.pgen.1002431 (PMC3261927; doi:10.1371/journal.pgen.1002431)
Supplement: Table S8 — The tissue-dependent regulation of 50 trait-associated genes that show discordant association between blood and SAT. (XLS) [file pgen.1002431.s025.xls]

## Sheet: gwasGene_Sat_dependency.txt
Gene Name	Probe ID	Tissue-dependent regulation	Associated Traits
ABCA1	4060358	alternative regulation	HDL cholesterol
AK3	670463	different effect size	Progressive supranuclear palsy; Height; Hematological parameters
APIP	7380010	different effect size	Cystic fibrosis severity
ATP5SL	1990274	opposite allelic direction	Height
C2orf74	4260609	different effect size	Crohns disease
CAV1	5550379	specific regulation	Glaucoma (primary open-angle); Electrocardiographic traits; PR interval
CD247	6290400	alternative regulation	Celiac disease and Rheumatoid arthritis; Systemic sclerosis
CLDN14	5340347	specific regulation	Kidney stones
DNM3	2190475	specific regulation	Waist-hip ratio; Mean platelet volume; Height
DOCK7	2640128	opposite allelic direction	Cholesterol, total; Triglycerides
ETFDH	580609	different effect size	Serum metabolites
EXOC2	5900187	specific regulation	Basal cell carcinoma (cutaneous); Tanning
FCGR2A	1990278	specific regulation	Ulcerative colitis
FGFR2	2970008	specific regulation	Breast cancer; Serum prostate-specific antigen levels
GPR39	4640273	specific regulation	Hypertension
HRG	990091	specific regulation	Activated partial thromboplastin time
INPP5E	3370255	different effect size	Ulcerative colitis
KTELC1	6550288	different effect size	Celiac disease
LBH	5130753	specific regulation	Celiac disease and Rheumatoid arthritis; Height
LDHC	110291	different effect size	Amyloid A Levels
LEPR	6980255	different effect size	C-reactive protein; Soluble leptin receptor levels
LHCGR	5260619	specific regulation	Polycystic ovary syndrome
LHCGR	1470168	specific regulation	Polycystic ovary syndrome
MLXIPL	5560148	specific regulation	Triglycerides
MRAS	3360196	different effect size	Coronary heart disease
NBPF3	5080431	different effect size	Serum phosphorus levels; Plasma levels of liver enzymes
NFIC	1850259	specific regulation	Height
NPHP3	1820746	different effect size	Menarche (age at onset)
NPLOC4	3310097	specific regulation	Eye color traits
OPTN	5260215	different effect size	Pagets disease
PEMT	1780411	opposite allelic direction	Coronary heart disease
PGM1	2070291	alternative regulation	Alcohol consumption
PLEKHA7	290563	different effect size	Systolic blood pressure
PPIC	2970735	specific regulation	Aortic root size
PRKCQ	3190193	specific regulation	Type 1 diabetes
PSMB8/PSMB9	3180026	specific regulation	Nephropathy
RREB1	50403	alternative regulation	Serum urate
SLC39A8	2320358	different effect size	Body mass index
SOCS5	6370379	specific regulation	Height
ST7L	1430279	specific regulation	Blood pressure
TMEM108	6940753	specific regulation	Menarche (age at onset)
TNFRSF11B	2370132	specific regulation	Osteoporosis; Bone mineral density (hip); Bone mineral density (spine); Bone mineral density
TNFSF4	5690398	alternative regulation	Systemic lupus erythematosus
TRIM4	2810674	different effect size	White matter hypersensitivity burden; Serum dehydroepiandrosterone sulphate levels
TSHZ2	5050538	specific regulation	Hemoglobin
TTC3	1820703	different effect size	HDL cholesterol; Eye color traits
TTC3	6020504	specific regulation	HDL cholesterol; Eye color traits
UBE2D1	3840392	specific regulation	Crohns disease
UBE2E3	2760196	different effect size	Celiac disease
WARS2	2510687	different effect size	Waist-hip ratio
